# Supplementary material for: Computational prediction of high methane storage capacity in V-MOF-74
Source: Royal Society of Chemistry journal article supplement (doi:10.1039/c7cp03605a), 2017-01-01
Supplement: c7cp03605a1.pdf [file c7cp03605a1.pdf]

# Computational Prediction of High Methane Storage Capacity in V-MOF-74

Seokwon Hyeon,<sup>a</sup> Young-Chul Kim,<sup>b</sup> and Jihan Kim<sup>\*a</sup>

*a Department of Chemical and Biomolecular Engineering, Korea Advanced Institute of Science and Technology (KAIST),  
291 Daehak-ro, Yuseong-gu, Daejeon 34141, Republic of Korea*

*bMaterial Development Center, Research & Development Division, Hyundai Motor Group, Hwaseong 18280, Republic of  
Korea*

\*correspondence to [jihankim@kaist.ac.kr](mailto:jihankim@kaist.ac.kr) (J. Kim)

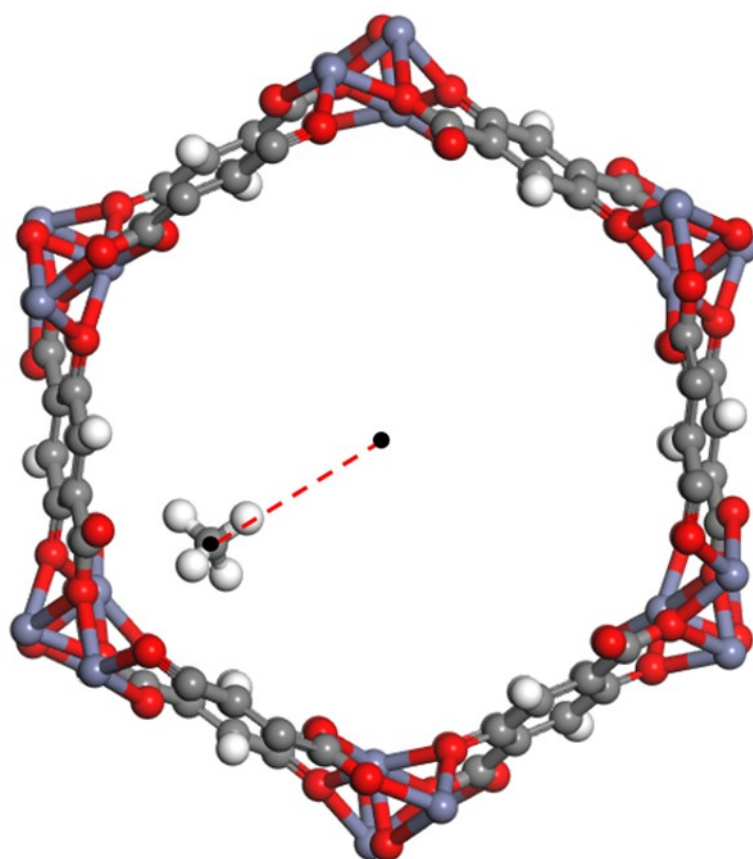

**Figure S1.** The figure represents the path of the sampled methane molecules along the dashed red line.

**Table S1.** Force Field Parameters for Each of Three Materials (vdW-DF, vdW-DF2, PBE+D2) for Co-MOF-74.

| Functional | Atom type | $\epsilon$ (K) | $\sigma$ (Å) |
|------------|-----------|----------------|--------------|
| vdW-DF     | Co        | 5064.13880     | 2.72         |
|            | C         | 54.02741       | 3.40         |
|            | O         | 31.09691       | 3.12         |
| vdW-DF2    | Co        | 2940.01624     | 2.24         |
|            | C         | 57.92403       | 3.32         |
|            | O         | 35.70363       | 2.98         |
| PBE+D2     | Co        | 8603.92784     | 1.74         |
|            | C         | 58.84683       | 3.12         |
|            | O         | 40.39893       | 2.60         |

**Table S2.** Force Field Parameters for Each of Three Materials (vdW-DF, vdW-DF2, PBE+D2) for Mg-MOF-74.

| Functional | Atom type | $\epsilon$ (K) | $\sigma$ (Å) |
|------------|-----------|----------------|--------------|
| vdW-DF     | Mg        | 5963.87        | 2.50         |
|            | C         | 54.03          | 3.40         |
|            | O         | 37.83          | 2.50         |
| vdW-DF2    | Mg        | 4028.53        | 2.06         |
|            | C         | 58.95          | 3.24         |
|            | O         | 38.68          | 2.82         |
| PBE+D2     | Mg        | 16633.65       | 1.52         |
|            | C         | 57.71          | 2.92         |
|            | O         | 34.94          | 2.16         |

**Table S3.** Force Field Parameters for Each of Three Materials (vdW-DF, vdW-DF2, PBE+D2) for Ni-MOF-74.

| Functional | Atom type | $\epsilon$ (K) | $\sigma$ (Å) |
|------------|-----------|----------------|--------------|
| vdW-DF     | Ni        | 5714.75        | 2.64         |
|            | C         | 54.00          | 3.40         |
|            | O         | 32.31          | 3.10         |
| vdW-DF2    | Ni        | 4331.56        | 2.10         |
|            | C         | 57.83          | 3.30         |
|            | O         | 35.85          | 2.90         |
| PBE+D2     | Ni        | 11149.26       | 1.70         |
|            | C         | 61.75          | 3.06         |
|            | O         | 37.83          | 3.08         |

**Table S4.** Calculated Binding Energies Using Various Exchange Correlation Functionals of the Methane in the Ni-MOF-74.

| Functional  | Binding Energy (kJ/mol) |
|-------------|-------------------------|
| optB86b-vdW | -29.74                  |
| optB88-vdW  | -28.61                  |
| optPBE-vdW  | -31.54                  |
| PBE         | -3.95                   |
| PBE+D2      | -24.77                  |
| PBEsol      | -7.62                   |
| vdW-DF      | -26.03                  |
| vdW-DF2     | -25.03                  |

**Table S5.** Derived Force Field Parameters for 9 M-MOF-74 (M= Co, Cr, Cu, Mg, Mn, Ni, Ti, V, and Zn) from  $s_6 = 0.45$  tuned PBE+D2 functional

| Structure | Atom type | $\epsilon$ (K) | $\sigma$ (Å) |
|-----------|-----------|----------------|--------------|
| Co-MOF-74 | Co        | 408.51         | 1.72         |
|           | C         | 65.39          | 3.10         |
|           | O         | 45.39          | 2.50         |
| Cr-MOF-74 | Cr        | 191.49         | 1.90         |
|           | C         | 54.86          | 3.40         |
|           | O         | 38.41          | 2.66         |
| Cu-MOF-74 | Cu        | 582.56         | 1.94         |
|           | C         | 72.32          | 3.00         |
|           | O         | 94.39          | 1.78         |
| Mg-MOF-74 | Mg        | 1660.93        | 1.52         |
|           | C         | 65.58          | 2.96         |
|           | O         | 42.00          | 2.26         |
| Mn-MOF-74 | Mn        | 597.93         | 1.74         |
|           | C         | 65.65          | 3.12         |
|           | O         | 46.77          | 2.44         |
| Ni-MOF-74 | Ni        | 835.67         | 1.70         |
|           | C         | 65.69          | 3.06         |
|           | O         | 46.10          | 2.44         |

---

|           |    |         |      |
|-----------|----|---------|------|
|           | Ti | 3947.88 | 1.56 |
| Ti-MOF-74 | C  | 59.65   | 3.16 |
|           | O  | 39.06   | 2.44 |
| <hr/>     |    |         |      |
|           | V  | 7190.74 | 1.44 |
| V-MOF-74  | C  | 35.33   | 2.40 |
|           | O  | 35.33   | 2.40 |
| <hr/>     |    |         |      |
|           | Zn | 956.27  | 1.68 |
| Zn-MOF-74 | C  | 69.18   | 2.74 |
|           | O  | 49.08   | 2.40 |

---



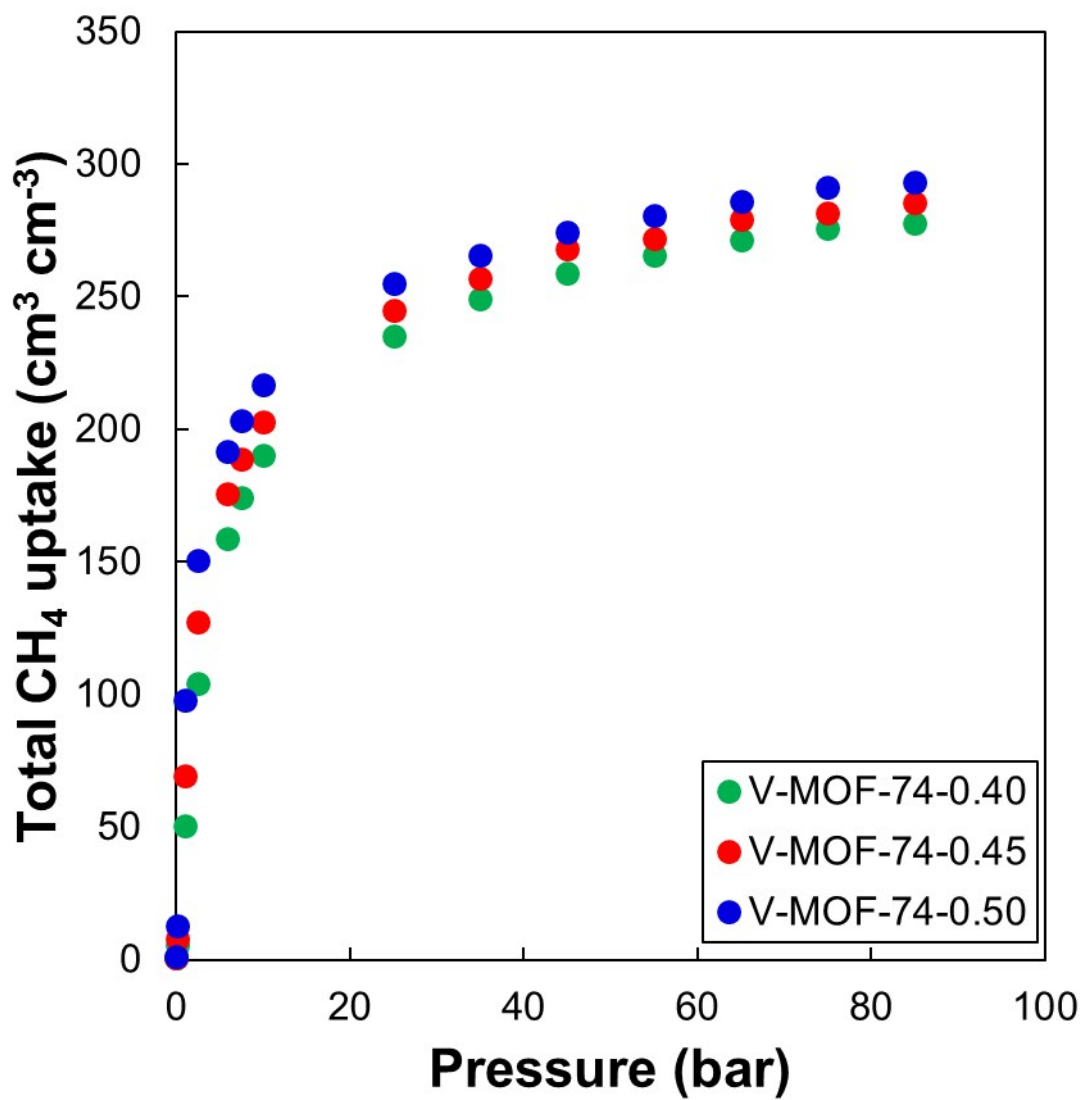

**Figure S2.** Predicted methane adsorption isotherm curves in V-MOF-74 with different force field parameters derived from various s6 parameters, 0.40 (green), 0.45 (red), and 0.50 (blue) at T = 298K.

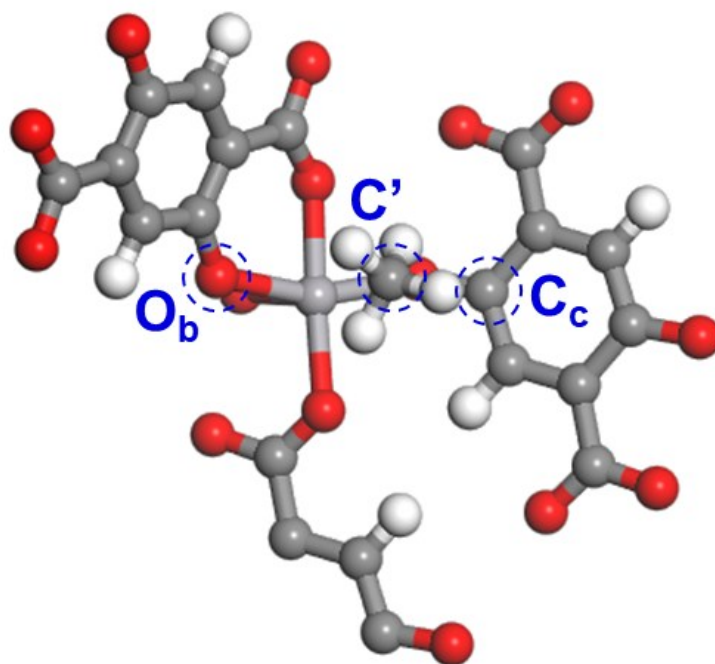

**Figure S3.** DFT optimized configuration of a single methane adsorbed inside V-MOF-74. The figure represents atoms as balls and sticks (gray, red, white, and silver for carbon, oxygen, hydrogen, and vanadium respectively).

**Table S6.** Comparison of Binding Geometries Calculated from DFT, and DFT-Derived Force Field.

| Source                  | Distance (Å) |                   |                   |
|-------------------------|--------------|-------------------|-------------------|
|                         | C'-V         | C'-C <sub>c</sub> | C'-O <sub>b</sub> |
| DFT                     | 2.88         | 3.57              | 3.47              |
| DFT-derived force field | 2.94         | 3.55              | 3.54              |

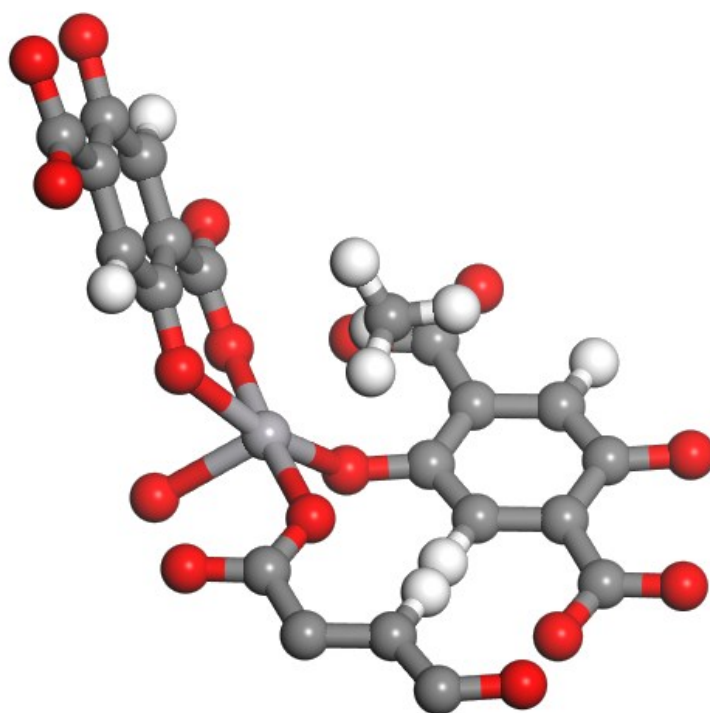

**Figure S4.** DFT optimized binding geometry for single CH<sub>4</sub> molecule in V-MOF-74.

**Table S7.** Comparison of Bond Length and Bend Angle for Adsorbed CH<sub>4</sub> with Free CH<sub>4</sub>.

|           | Optimized       | Reference value |
|-----------|-----------------|-----------------|
| C-H (Å)   | 1.097-1.103     | 1.087           |
| H-C-H (°) | 107.508-110.595 | 109.5           |

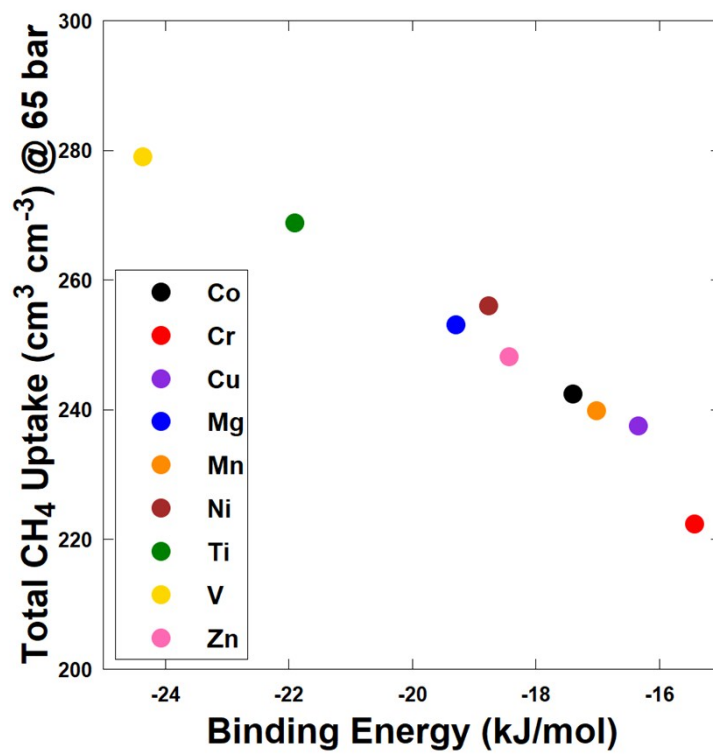

Figure S5. DFT ( $s_6 = 0.45$ ) binding energy and total CH<sub>4</sub> uptake at 65 bar and 298 K.
